# Supplementary material for: Differential Responses to Bioink-Induced Oxidative Stress in Endothelial Cells and Fibroblasts
Source: Int J Mol Sci. 2021 Feb 26;22(5):2358. doi: 10.3390/ijms22052358 (PMC7956320; doi:10.3390/ijms22052358)
Supplement: Supplementary file 1 [file ijms-22-02358-s001.pdf]

## Supplementary Information

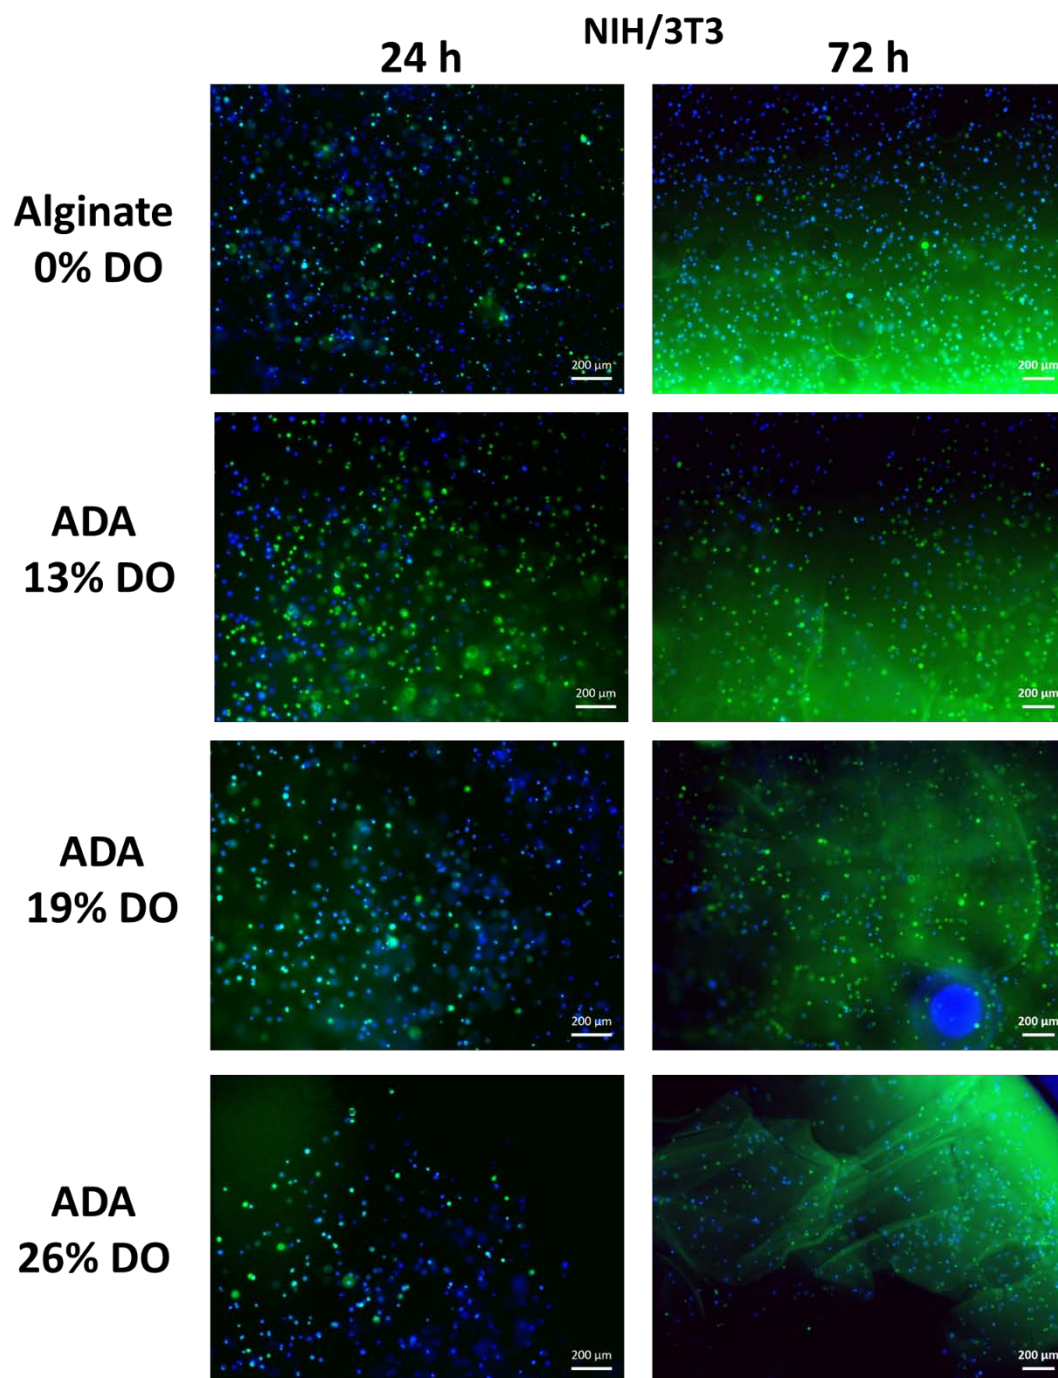

**Figure S1:** Calcein AM/DAPI staining of NIH/3T3 cells after 24 h or 72 h of incubation in ADA hydrogels with growing degree of oxidation (as indicated). Example images are shown. Nuclei (blue), Calcein (green).

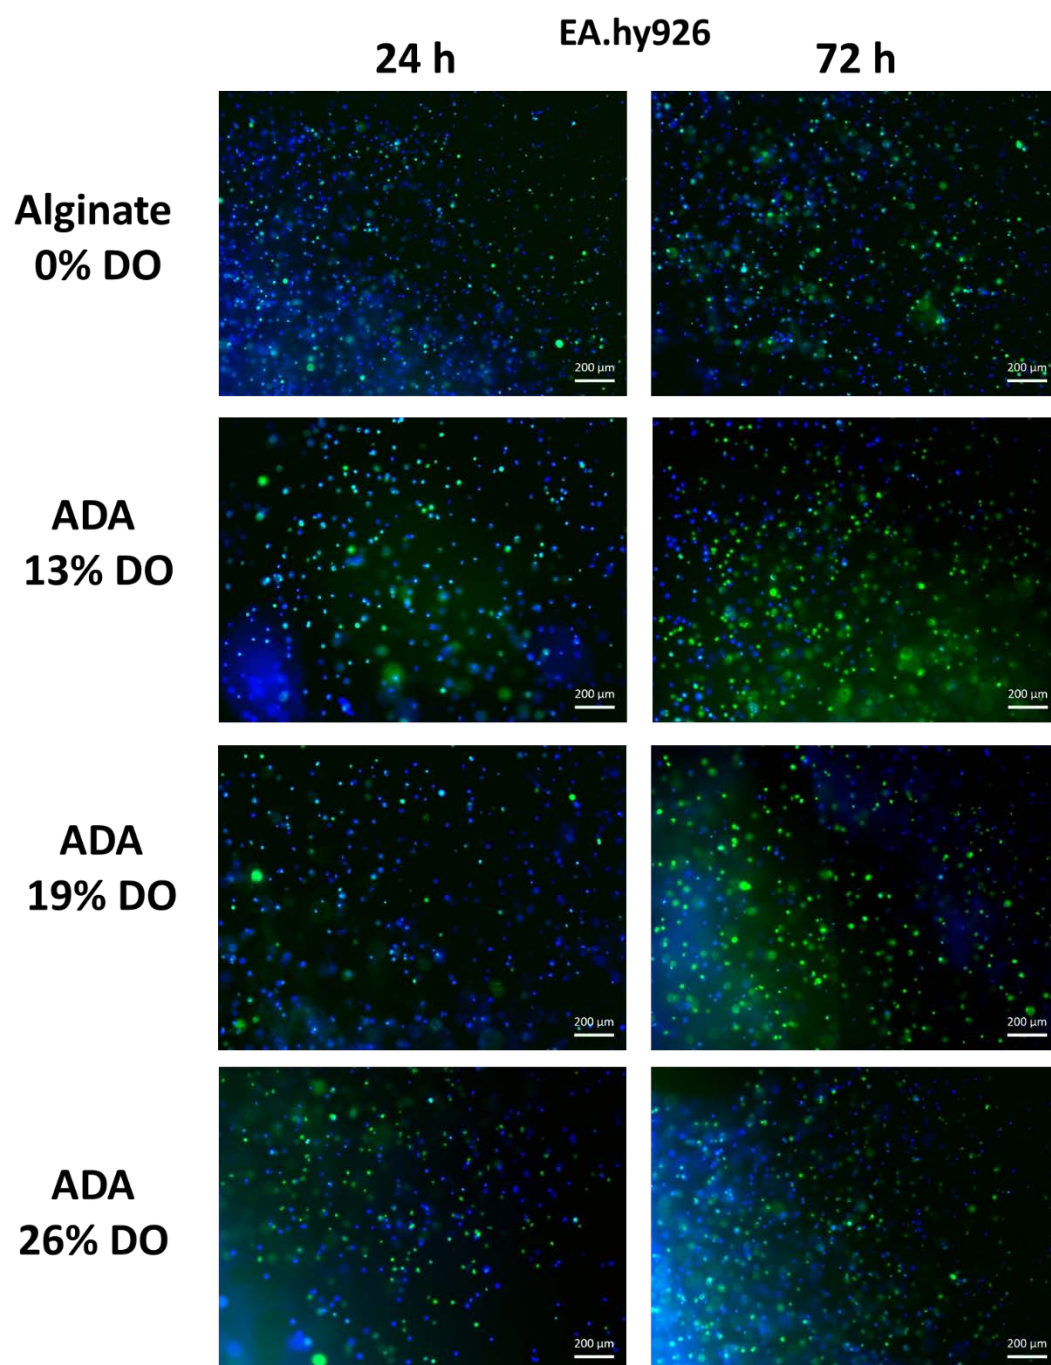

**Figure S2:** Calcein AM/DAPI staining of Ea.hy926 cells after 24 h or 72 h of incubation in ADA hydrogels with growing degree of oxidation (as indicated). Example images are shown. Nuclei (blue), Calcein (green).
